# Supplementary material
Source: PubMed Central journal article supplement (PMC11028377)
Supplement: 262_2018_2233_MOESM1_ESM.pdf [file 262_2018_2233_MOESM1_ESM.pdf]

**Supplementary Table 1. Sequences of primers for quantitative real-time PCR**

| Gene          | Forward primer              | Reverse primer                 |
|---------------|-----------------------------|--------------------------------|
| IL-6          | 5'-TGTGACATGGCAATTCTGAT-3'  | 5'-GGTACTCCAGAAGACCAGAGGA-3'   |
| IL-12         | 5'-GGAAGCACGGCAGCAGAATA-3'  | 5'-AACTTGAGGGAGAAGTGGGAATGG-3' |
| TNF- $\alpha$ | 5'-TGCCTATGTCTCAGCCTCTTC-3' | 5'-GGTCTGGGCCATAGAACTGA-3'     |
| IL-10         | 5'-CAGCCGGAAGACAATAACT-3'   | 5'-TCATTTCCGATAAGGCTTGG-3'     |
| TGF- $\beta$  | 5'-GACATTCGGAAGCAG-3'       | 5'-CCACTCAGGCGTATCAG-3'        |
| GAPDH         | 5'-TGCTGTCCCTGTATGCCTCTG-3' | 5'-TTGATGTCACGCACGATTTCC-3'    |
